# Supplementary material for: Fabrication of electroactive poly(vinylidene fluoride) through non-isothermal crystallization and supercritical CO2 processing
Source: Royal Society of Chemistry journal article supplement (doi:10.1039/c7ra09162a), 2017-01-01
Supplement: c7ra09162a1.pdf [file c7ra09162a1.pdf]

Electronic Supplementary Material (ESI) for RSC Advances.  
This Journal is © The Royal Society of Chemistry 2017

## Fabrication of electroactive poly(vinylidene fluoride) through non-isothermal crystallization and supercritical CO<sub>2</sub> processing

Ji Eun Lee,<sup>a</sup> Yanting Guo<sup>a</sup>, Richard Eungkee Lee<sup>a</sup> and Siu Ning Leung<sup>\*a</sup>

<sup>a</sup>Department of Mechanical Engineering, Lassonde School of Engineering, York University, Toronto, ON, Canada M3J 1P3

\*Corresponding author: sunny.leung@lassonde.yorku.ca

### I. Peak to valley height ratio method

Fig. S1 visualizes the definition of  $\Delta H_{\beta}$  and  $\Delta H_{\gamma}$ , the height difference between the peaks at 1275 cm<sup>-1</sup> and 1234 cm<sup>-1</sup> to their nearest valleys, respectively. The wavenumbers of the valleys differ depending on the FTIR absorbance curve but they are approximately at 1260 and 1225 cm<sup>-1</sup> for  $\Delta H_{\beta}$  and  $\Delta H_{\gamma}$ , respectively.

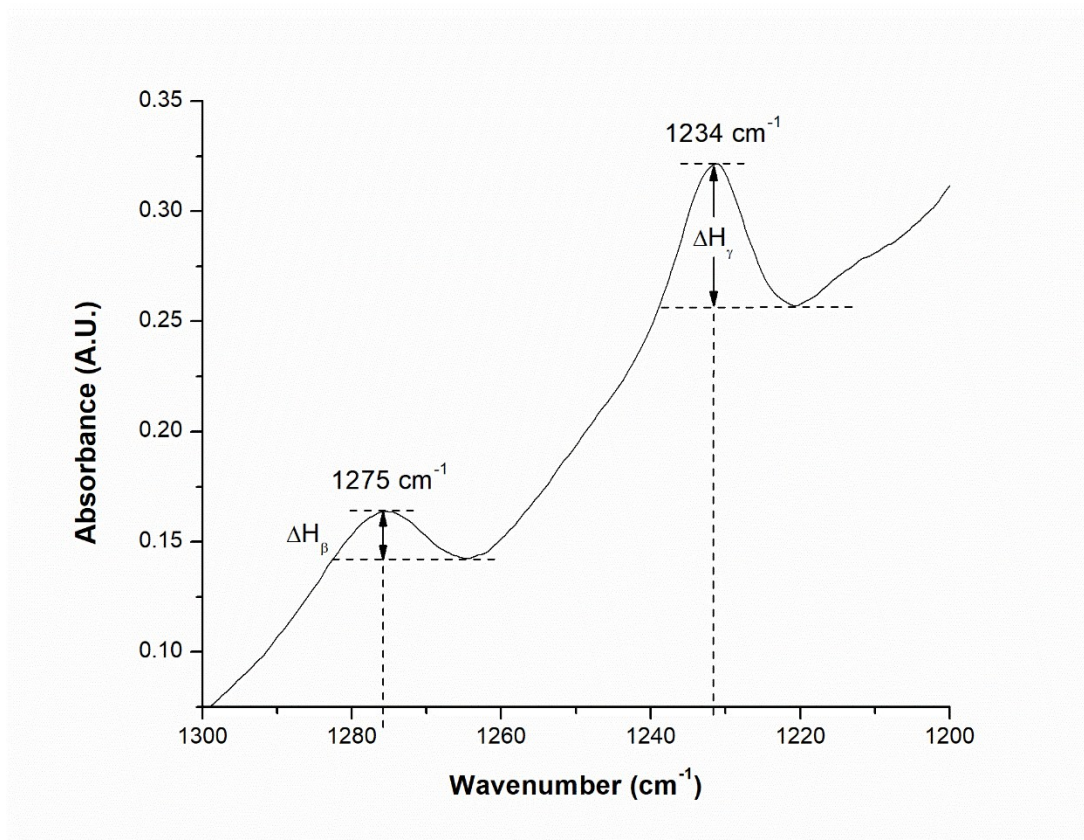

Figure S1 Visual representation of  $\Delta H_{\beta}$  and  $\Delta H_{\gamma}$  for the peak to valley height ratio method

## II. Volume expansion ratios of samples prepared using temperature profile 1

Equations (1) and (2) were used to determine the volume expansion ratio (*VER*) of ScCO<sub>2</sub> processed PVDF samples. Each condition used at least three samples to calculate the average *VER* and the standard deviations. All *VER* had a standard deviation smaller than 0.55 except the samples prepared at saturation pressure and temperature at 2500 psi and 160°C, respectively, with a standard deviation of 2.57. The slightly larger standard deviation did not affect the overall trend of the relationship between the *VER* and the ScCO<sub>2</sub> processing conditions.

**Table S1** Raw data for volume expansion ratio for temperature profile 1

| Saturation Pressure (psi) | Saturation Temperature (°C) | Average <i>VER</i> | Standard Deviation |
|---------------------------|-----------------------------|--------------------|--------------------|
| 1200                      | 100                         | 1.02               | 0.01               |
| 1200                      | 120                         | 1.02               | 0.01               |
| 1200                      | 140                         | 1.03               | 0.02               |
| 1200                      | 160                         | 3.78               | 0.41               |
| 1200                      | 180                         | 1.26               | 0.08               |
| 2000                      | 100                         | 1.02               | 0.01               |
| 2000                      | 120                         | 1.03               | 0.01               |
| 2000                      | 140                         | 1.04               | 0.01               |
| 2000                      | 160                         | 15.35              | 0.52               |
| 2000                      | 180                         | 1.22               | 0.08               |
| 2500                      | 100                         | 1.01               | 0.04               |
| 2500                      | 120                         | 1.03               | 0.01               |
| 2500                      | 140                         | 1.08               | 0.01               |
| 2500                      | 160                         | 12.76              | 2.57               |
| 2500                      | 180                         | 1.18               | 0.04               |

### III. Degree of crystallinity of samples prepared using temperature profile 1

Equation (3) was used to determine the degree of crystallinity ( $X_c$ ). Each condition used at least three samples to calculate the average  $X_c$  and standard deviation. "Compression molded" are samples without undergoing non-isothermal crystallization or  $\text{ScCO}_2$  processing. The  $X_c$  for samples prepared using temperature profile 1 had an average standard deviation of 1.35.

**Table S2** Raw data for degree of crystallinity for temperature profile 1

| Saturation Pressure (psi) | Saturation Temperature (°C) | Average $X_c$ (%) | Standard Deviation (%) |
|---------------------------|-----------------------------|-------------------|------------------------|
| Compression Molded        | -                           | 43.61             | 4.62                   |
| No CO <sub>2</sub>        | 100                         | 55.51             | 0.97                   |
| No CO <sub>2</sub>        | 120                         | 54.80             | 0.69                   |
| No CO <sub>2</sub>        | 140                         | 51.96             | 1.45                   |
| No CO <sub>2</sub>        | 160                         | 51.17             | 0.30                   |
| No CO <sub>2</sub>        | 180                         | 40.61             | 0.93                   |
| 1200                      | 100                         | 52.67             | 1.41                   |
| 1200                      | 120                         | 54.17             | 1.53                   |
| 1200                      | 140                         | 51.72             | 2.66                   |
| 1200                      | 160                         | 47.85             | 1.75                   |
| 1200                      | 180                         | 41.43             | 1.30                   |
| 2000                      | 100                         | 48.15             | 1.32                   |
| 2000                      | 120                         | 53.20             | 0.80                   |
| 2000                      | 140                         | 53.49             | 1.08                   |
| 2000                      | 160                         | 43.93             | 1.62                   |
| 2000                      | 180                         | 40.34             | 1.73                   |
| 2500                      | 100                         | 51.16             | 0.13                   |
| 2500                      | 120                         | 51.68             | 1.17                   |
| 2500                      | 140                         | 53.40             | 1.23                   |
| 2500                      | 160                         | 46.74             | 0.95                   |
| 2500                      | 180                         | 42.09             | 0.66                   |

#### IV. Volume expansion ratios of samples prepared using temperature profile 2

This analysis was identical to the *VER* of samples prepared using temperature profile 1, using Equations (1) and (2). Each condition used at least three to calculate for the average *VER* and standard deviations.

**Table S3** Raw data for volume expansion ratio for temperature profile 2

| Saturation Pressure,<br>$P_{sat}$ (psi) | Heating Temperature,<br>$T_H$ (°C) | Saturation Temperature,<br>$T_{sat}$ (°C) | Pressure Drop Rate,<br>$-dP/dt$ (MPa/s) | Average <i>VER</i> | Standard Deviation |
|-----------------------------------------|------------------------------------|-------------------------------------------|-----------------------------------------|--------------------|--------------------|
| 2000                                    | 180                                | 160                                       | 190.6                                   | 4.52               | 0.37               |
| 2000                                    | 180                                | 160                                       | 55.2                                    | 2.73               | 0.19               |
| 2000                                    | 200                                | 160                                       | 190.6                                   | 12.00              | 2.07               |

#### V. Degree of crystallinity of samples prepared using temperature profile 2

**Table S4** Raw data for degree of crystallinity for temperature profile 2

| Saturation Pressure, $P_{sat}$ (psi) | Heating Temp.,<br>$T_H$ (°C) | Saturation Temp.,<br>$T_{sat}$ (°C) | Pressure Drop Rate,<br>$-dP/dt$ (MPa/s) | Average<br>$X_C$ (%) | Standard Deviation (%) |
|--------------------------------------|------------------------------|-------------------------------------|-----------------------------------------|----------------------|------------------------|
| No CO <sub>2</sub>                   | 180                          | 160                                 | 190.6                                   | 51.13                | 2.01                   |
| 2000                                 | 180                          | 160                                 | 190.6                                   | 52.40                | 2.02                   |
| 2000                                 | 180                          | 160                                 | 55.2                                    | 45.85                | 1.22                   |
| 2000                                 | 200                          | 160                                 | 190.6                                   | 54.98                | 2.38                   |

## VI. Scanning electron microscopy of samples prepared using temperature profile 2 for the observation of PVDF's microstructures

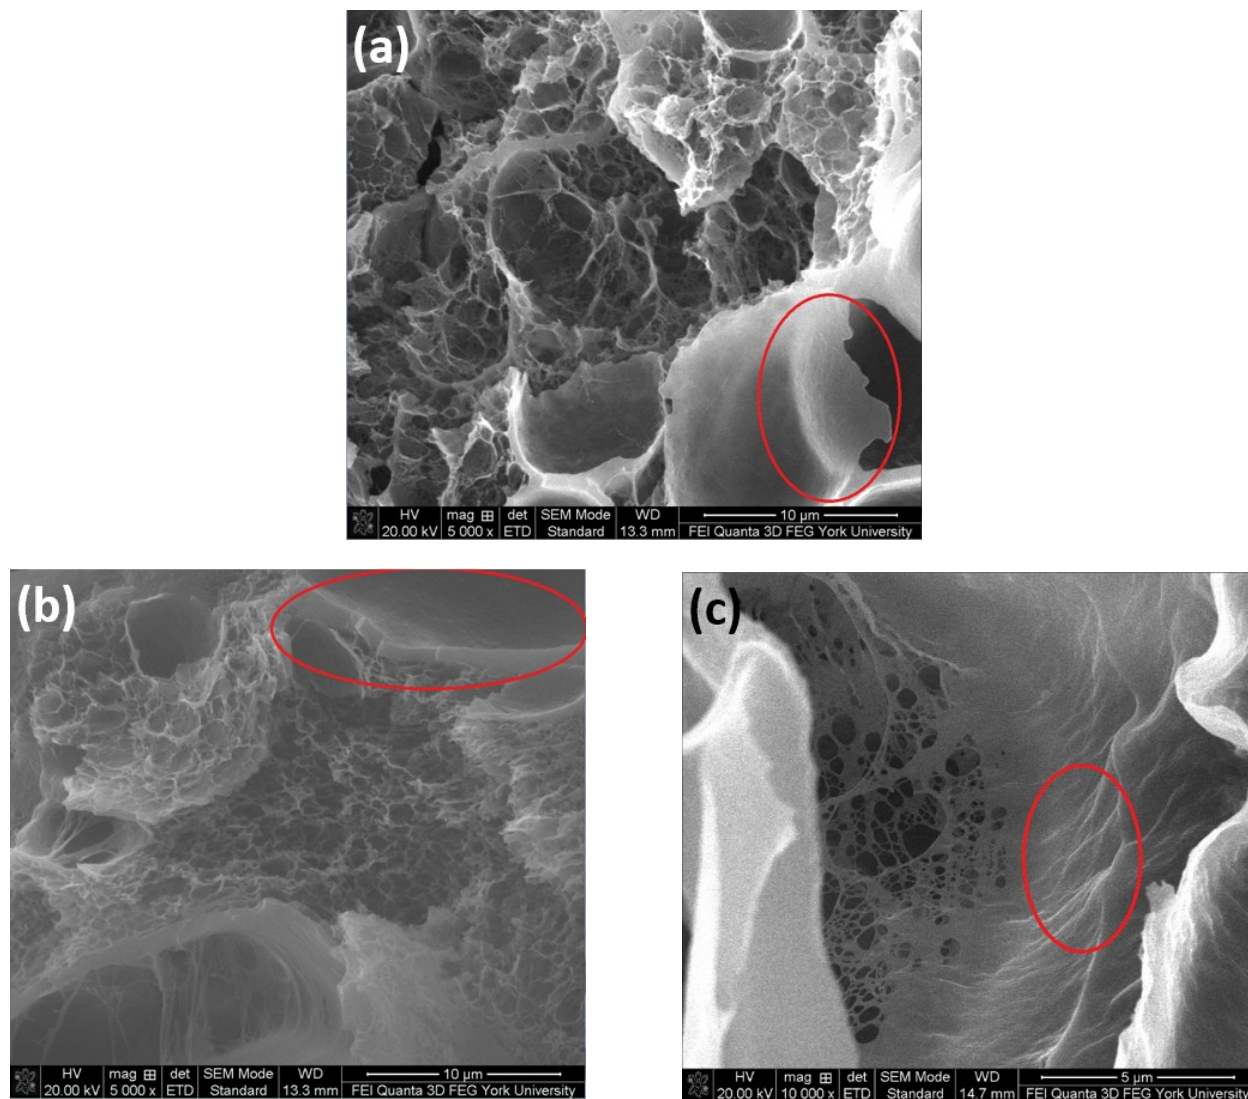

**Figure S2** SEM micrographs of PVDF samples showcasing their microstructures after being processed by ScCO<sub>2</sub> using temperature profile 2 at 2000 psi,  $T_{sot}$  of 160°C and  $T_H$  of: (a) 180°C with  $-dP/dt = 190.6$  MPa/s at 5000x; (b) 180°C with  $-dP/dt = 55.2$  MPa/s at 5000x; (c) 200°C with  $-dP/dt = 190.6$  MPa/s at 10 000x
